# Supplementary material for: Unraveling the role of intra-cellular metabolites in the lactic acid production by novel Bacillus amyloliquefaciens using sugarcane molasses as a substratum
Source: Royal Society of Chemistry journal article supplement (doi:10.1039/d3mo00141e), 2023-08-31
Supplement: d3mo00141e2.xlsx [file d3mo00141e2.xlsx]

## Sheet: Sheet1
Travel (mm)	bMN with 90 µl backing	sd	bMN with 70 µl backing	sd	bMN with 50 µl backing	sd	bMN with 30 µl backing	sd	solid MN without bubbles	sd
0	0	0	0	0	0	0	0	0	0.0018	0
0.02	0.005	0.00057	0.0013	0.00042	0.0018	0.00042	0.0012	0.00049	0.003	0.004
0.04	0.0019	0.00085	0.0024	0.00028	0.0022	0.00049	0.0023	0.00028	0.0052	0.0003
0.06	0.0029	0.00084	0.0034	0.00027	0.0033	0.0018	0.003	0.00035	0.0105	0.005
0.08	0.0048	0.0033	0.0041	0.00029	0.0038	0.0038	0.0034	0.0001	0.0195	0.01
0.1	0.0075	0.004	0.0051	0.00026	0.0042	0.0022	0.004	0.00049	0.0349	0.01
0.12	0.012	0.005	0.0059	0.00028	0.005	0.0042	0.0045	0.00092	0.055	0.016
0.14	0.028	0.01	0.014	0.00028	0.01	0.0093	0.0071	0.001	0.071	0.02
0.16	0.04	0.014	0.022	0.00014	0.018	0.004	0.011	0.002	0.0979	0.016
0.18	0.066	0.019	0.04	0.001	0.026	0.011	0.015	0.003	0.118	0.03
0.2	0.081	0.011	0.056	0.005	0.041	0.004	0.018	0.016	0.132	0.021
0.22	0.101	0.026	0.067	0.008	0.05	0.014	0.023	0.01	0.152	0.022
0.24	0.118	0.032	0.08	0.013	0.06	0.007	0.033	0.041	0.1862	0.011
0.26	0.147	0.021	0.096	0.018	0.078	0.011	0.042	0.02	0.218	0.017
0.28	0.173	0.015	0.118	0.014	0.099	0.013	0.055	0.012	0.239	0.035
0.3	0.193	0.024	0.142	0.012	0.115	0.018	0.059	0.011	0.2792	0.011
0.32	0.228	0.032	0.167	0.013	0.122	0.023	0.078	0.034	0.2999	0.014
0.34	0.257	0.046	0.199	0.015	0.15	0.03	0.099	0.04	0.328	0.027
0.36	0.281	0.019	0.229	0.022	0.169	0.047	0.114	0.025	0.3732	0.034
0.38	0.326	0.035	0.247	0.025	0.199	0.054	0.139	0.015	0.4123	0.024
0.4	0.371	0.046	0.289	0.017	0.224	0.034	0.154	0.017	0.443	0.018
