# Supplementary material for: Unraveling the role of intra-cellular metabolites in the lactic acid production by novel Bacillus amyloliquefaciens using sugarcane molasses as a substratum
Source: Royal Society of Chemistry journal article supplement (doi:10.1039/d3mo00141e), 2023-08-31
Supplement: d3mo00141e4.pdf [file d3mo00141e4.pdf]

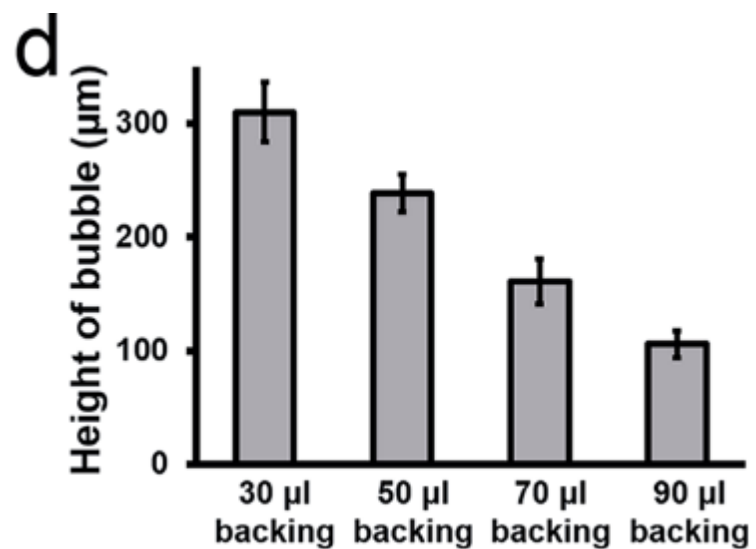

|                  | 30 $\mu\text{l}$ backing | 50 $\mu\text{l}$ backing | 70 $\mu\text{l}$ backing | 90 $\mu\text{l}$ backing |
|------------------|--------------------------|--------------------------|--------------------------|--------------------------|
| Height of bubble | 310.00                   | 238.50                   | 161.00                   | 105.75                   |
| sd               | 26.46                    | 16.30                    | 20.02                    | 11.79                    |

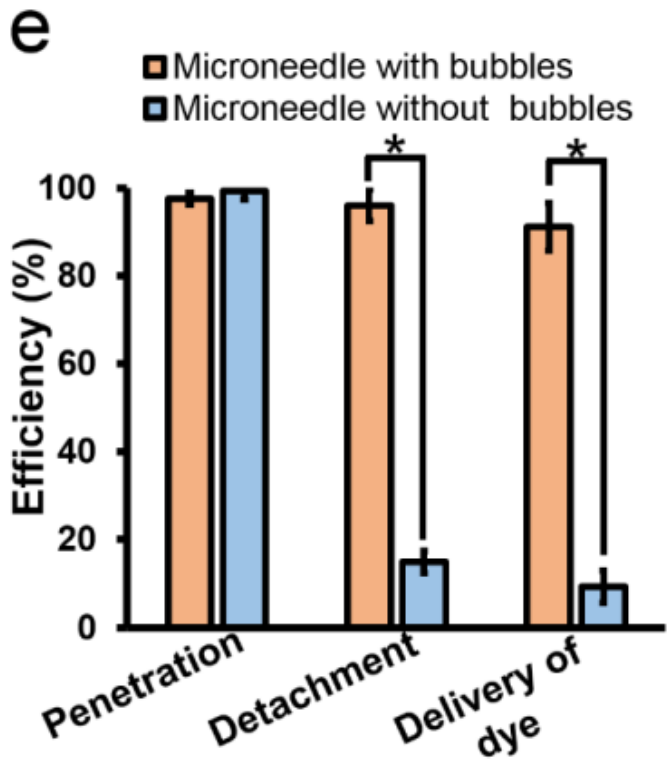

|                             | Penetration | sd   | Detachment | sd   | Delivery of dye | sd   |
|-----------------------------|-------------|------|------------|------|-----------------|------|
| Microneedle with bubbles    | 97.60       | 1.30 | 96.00      | 3.65 | 91.12           | 5.44 |
| Microneedle without bubbles | 99.20       | 1.89 | 15.00      | 2.50 | 9.23            | 3.70 |

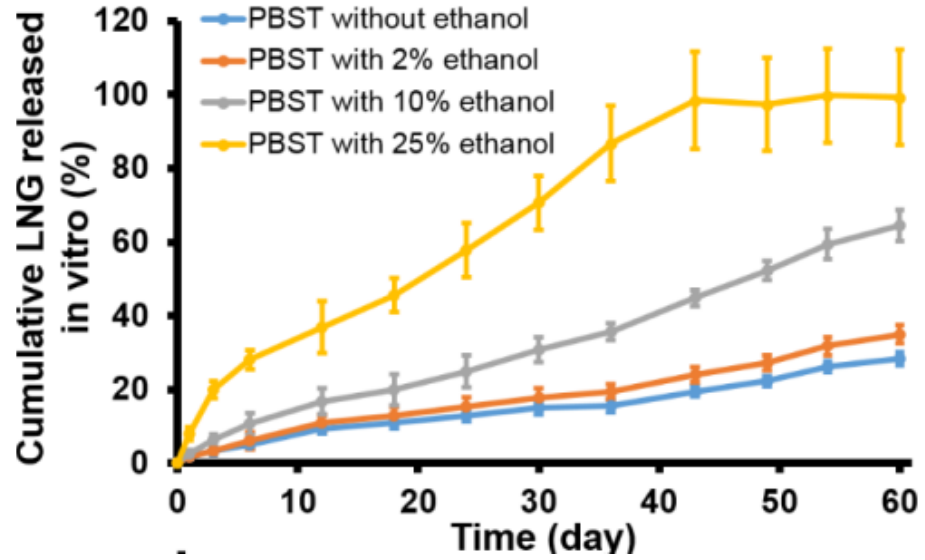

| Time (Day) | PBST without ethanol |       | PBST with 2% ethanol |       | PBST with 10% ethanol |       | PBST with 25% ethanol |        |
|------------|----------------------|-------|----------------------|-------|-----------------------|-------|-----------------------|--------|
|            | Mean                 | sd    | Mean                 | sd    | Mean                  | sd    | Mean                  | sd     |
| 0          | 0.000                | 0.000 | 0.000                | 0.000 | 0.000                 | 0.000 | 0.000                 | 0.000  |
| 1          | 1.660                | 0.528 | 1.817                | 0.506 | 2.637                 | 0.990 | 8.020                 | 1.826  |
| 3          | 3.273                | 1.177 | 3.383                | 0.906 | 6.340                 | 1.403 | 19.893                | 2.311  |
| 6          | 5.127                | 0.992 | 6.123                | 2.275 | 10.617                | 3.045 | 28.037                | 2.594  |
| 12         | 9.280                | 1.230 | 10.883               | 2.028 | 16.797                | 3.430 | 36.917                | 6.948  |
| 18         | 11.000               | 1.639 | 13.007               | 2.276 | 19.980                | 4.239 | 45.613                | 4.628  |
| 24         | 12.940               | 1.675 | 15.363               | 2.536 | 24.910                | 4.411 | 57.840                | 7.268  |
| 30         | 14.940               | 1.716 | 17.753               | 2.492 | 30.767                | 3.330 | 70.693                | 7.321  |
| 36         | 15.717               | 1.769 | 19.350               | 2.054 | 35.683                | 2.268 | 86.737                | 10.140 |
| 43         | 19.457               | 1.369 | 24.020               | 1.958 | 44.863                | 2.171 | 98.483                | 13.051 |
| 49         | 22.303               | 1.384 | 27.247               | 2.106 | 52.333                | 2.616 | 97.350                | 12.617 |
| 54         | 26.130               | 1.436 | 31.787               | 2.498 | 59.450                | 4.050 | 99.777                | 12.812 |
| 60         | 28.413               | 1.717 | 34.953               | 2.469 | 64.487                | 4.160 | 99.383                | 12.950 |

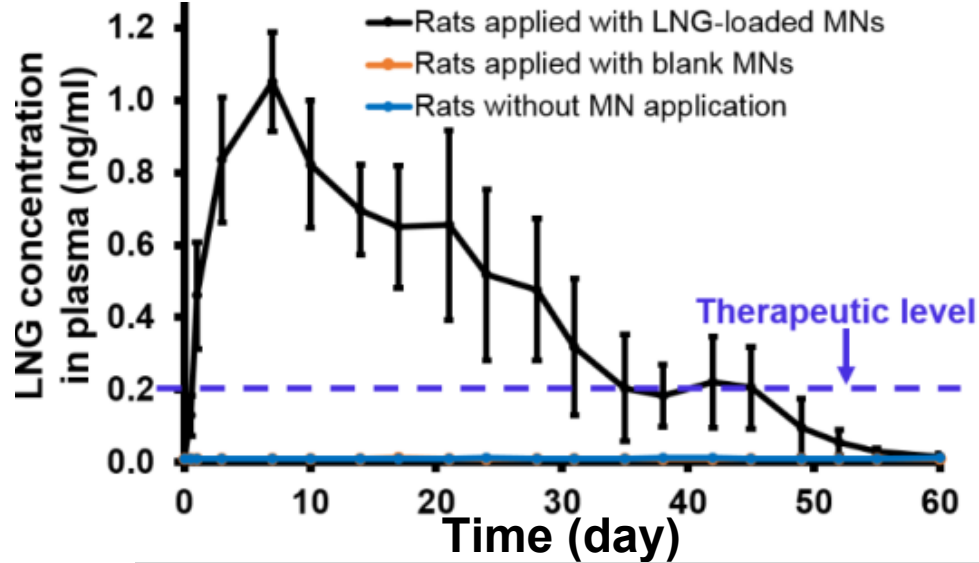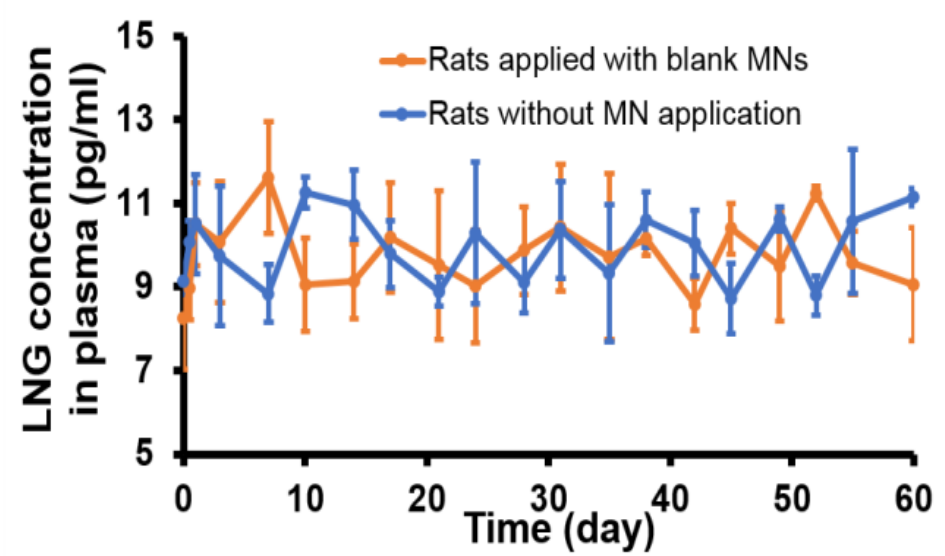

| time (d) | Rats applied with LNG-loaded MNs (ng/ml) |       | Rats applied with blank MNs (pg/ml) |       | Rats without MN application (pg/ml) |       |
|----------|------------------------------------------|-------|-------------------------------------|-------|-------------------------------------|-------|
|          | Mean                                     | sd    | Mean                                | sd    | Mean                                | sd    |
| 0        | 0.008                                    | 0.001 | 8.265                               | 1.230 | 9.132                               | 0.320 |
| 0.5      | 0.129                                    | 0.055 | 8.959                               | 0.754 | 10.073                              | 0.515 |
| 1        | 0.460                                    | 0.147 | 10.499                              | 0.987 | 10.499                              | 1.179 |
| 3        | 0.836                                    | 0.174 | 10.073                              | 1.450 | 9.733                               | 1.669 |
| 7        | 1.051                                    | 0.136 | 11.610                              | 1.331 | 8.839                               | 0.690 |
| 10       | 0.823                                    | 0.175 | 9.057                               | 1.120 | 11.244                              | 0.371 |
| 14       | 0.697                                    | 0.124 | 9.132                               | 0.901 | 10.964                              | 0.820 |
| 17       | 0.650                                    | 0.170 | 10.190                              | 1.310 | 9.790                               | 0.798 |
| 21       | 0.655                                    | 0.261 | 9.520                               | 1.780 | 8.880                               | 0.351 |
| 24       | 0.517                                    | 0.235 | 9.010                               | 1.360 | 10.280                              | 1.693 |
| 28       | 0.476                                    | 0.196 | 9.870                               | 1.045 | 9.120                               | 0.733 |
| 31       | 0.318                                    | 0.189 | 10.420                              | 1.524 | 10.366                              | 1.165 |
| 35       | 0.204                                    | 0.147 | 9.723                               | 1.977 | 9.330                               | 1.644 |
| 38       | 0.183                                    | 0.085 | 10.153                              | 0.394 | 10.603                              | 0.663 |
| 42       | 0.221                                    | 0.126 | 8.578                               | 0.617 | 10.034                              | 0.789 |
| 45       | 0.206                                    | 0.113 | 10.390                              | 0.602 | 8.713                               | 0.837 |
| 49       | 0.096                                    | 0.080 | 9.494                               | 1.311 | 10.623                              | 0.291 |
| 52       | 0.054                                    | 0.036 | 11.241                              | 0.172 | 8.800                               | 0.470 |
| 55       | 0.028                                    | 0.010 | 9.572                               | 0.765 | 10.561                              | 1.719 |
| 60       | 0.016                                    | 0.008 | 9.062                               | 1.356 | 11.141                              | 0.203 |

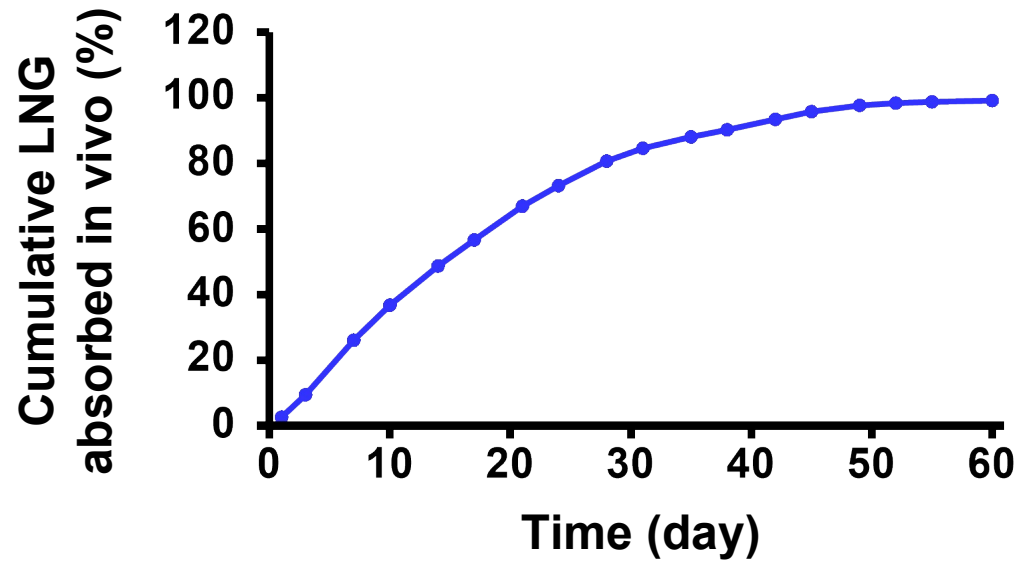

| Time (d) | Mean    | sd     |
|----------|---------|--------|
| 1        | 2.5825  | 0.9673 |
| 3        | 9.4238  | 2.6888 |
| 7        | 26.0700 | 5.9010 |
| 10       | 36.7475 | 7.5376 |
| 14       | 48.7050 | 9.0857 |
| 17       | 56.6350 | 9.3460 |
| 21       | 66.9563 | 9.4242 |
| 24       | 73.2175 | 8.9814 |
| 28       | 80.7050 | 8.1646 |
| 31       | 84.6088 | 6.8824 |
| 35       | 88.0900 | 5.1863 |
| 38       | 90.2488 | 4.5099 |
| 42       | 93.4388 | 3.4788 |
| 45       | 95.7988 | 2.7105 |
| 49       | 97.6825 | 1.8454 |
| 52       | 98.3963 | 1.5421 |
| 55       | 98.7888 | 1.5153 |
| 60       | 99.1650 | 1.5053 |

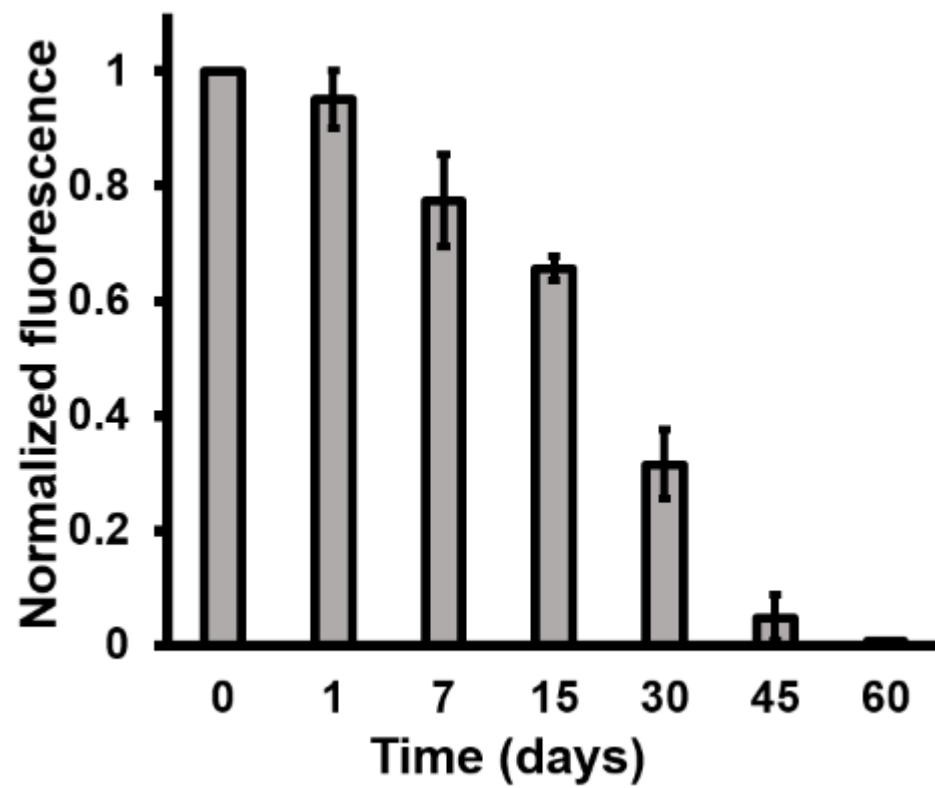

|            |   |      |      |      |      |      |      |
|------------|---|------|------|------|------|------|------|
| Time (day) | 0 | 1    | 7    | 15   | 30   | 45   | 60   |
| Normalized | 1 | 0.95 | 0.77 | 0.66 | 0.32 | 0.05 | 0.01 |
| sd         | 0 | 0.05 | 0.08 | 0.02 | 0.06 | 0.04 | 0.00 |

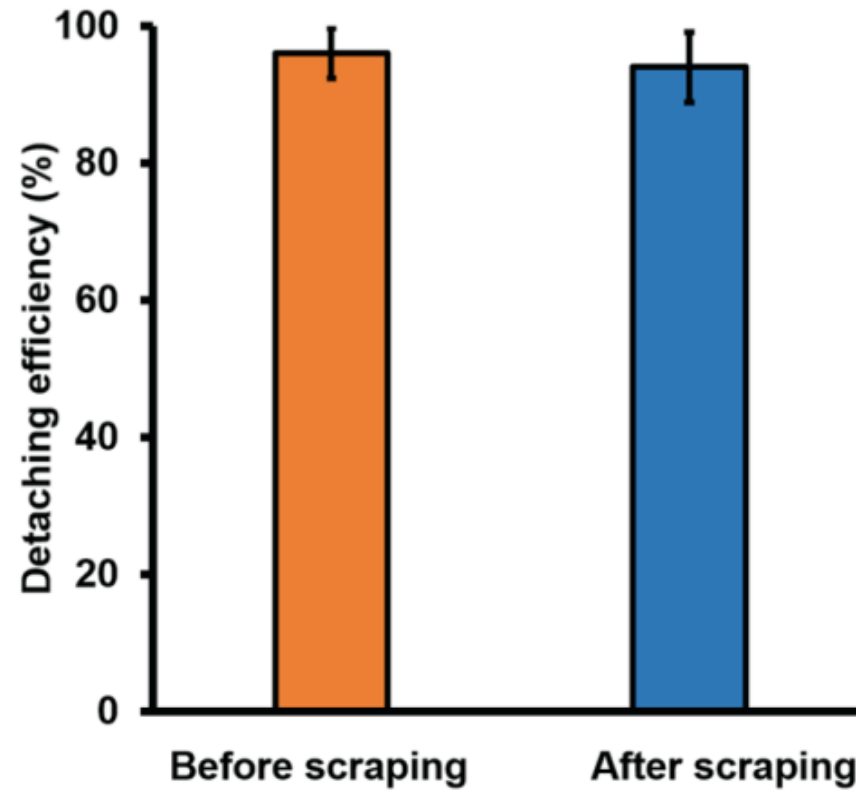

|      | Before scraping | After scraping |
|------|-----------------|----------------|
| Mean | 96.2            | 94.0           |
| sd   | 3.7             | 5.1            |

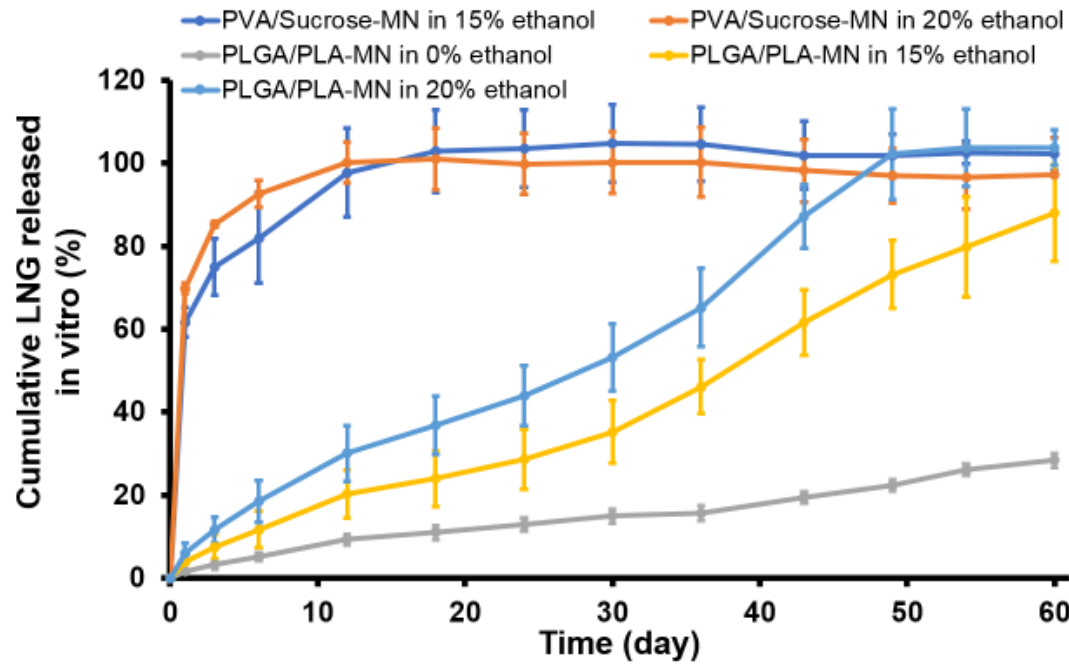

| Time (day) | PVA/Sucrose-MN in 15%EtOH |        | PVA/Sucrose-MN in 20%EtOH |       | PLGA/PLA-MN in 15% EtOH |        | PLGA/PLA-MN in 20% EtOH |        | PLGA/PLA-MN in 0% EtOH |       |
|------------|---------------------------|--------|---------------------------|-------|-------------------------|--------|-------------------------|--------|------------------------|-------|
|            | mean                      | sd     | mean                      | sd    | mean                    | sd     | mean                    | sd     | mean                   | sd    |
| 0          | 0                         | 0      | 0                         | 0     | 0                       | 0      | 0                       | 0      | 0                      | 0     |
| 1          | 61.659                    | 3.589  | 69.854                    | 1.253 | 3.958                   | 1.994  | 6.037                   | 2.347  | 1.660                  | 0.528 |
| 3          | 74.946                    | 6.835  | 85.250                    | 0.790 | 7.530                   | 2.976  | 11.594                  | 3.107  | 3.273                  | 1.177 |
| 6          | 82.019                    | 10.854 | 92.632                    | 3.169 | 11.686                  | 4.399  | 18.525                  | 5.060  | 5.127                  | 0.992 |
| 12         | 97.686                    | 10.703 | 100.128                   | 4.935 | 20.311                  | 5.752  | 30.117                  | 6.723  | 9.280                  | 1.230 |
| 18         | 102.868                   | 9.945  | 100.958                   | 7.450 | 23.965                  | 6.786  | 36.819                  | 6.983  | 11.000                 | 1.639 |
| 24         | 103.540                   | 9.373  | 99.771                    | 7.343 | 28.660                  | 7.320  | 44.031                  | 7.268  | 12.940                 | 1.675 |
| 30         | 104.814                   | 9.358  | 100.165                   | 7.403 | 35.254                  | 7.528  | 53.155                  | 8.122  | 14.940                 | 1.716 |
| 36         | 104.543                   | 8.842  | 100.213                   | 8.412 | 46.156                  | 6.582  | 65.218                  | 9.405  | 15.717                 | 1.769 |
| 43         | 101.878                   | 8.195  | 98.210                    | 7.541 | 61.579                  | 7.928  | 87.128                  | 7.621  | 19.457                 | 1.369 |
| 49         | 101.806                   | 5.253  | 97.042                    | 6.625 | 73.219                  | 8.209  | 102.201                 | 10.845 | 22.303                 | 1.384 |
| 54         | 102.542                   | 2.670  | 96.661                    | 7.605 | 79.822                  | 12.124 | 103.754                 | 9.403  | 26.130                 | 1.436 |
| 60         | 102.224                   | 4.026  | 97.281                    | 8.891 | 87.985                  | 11.602 | 103.663                 | 4.324  | 28.413                 | 1.717 |



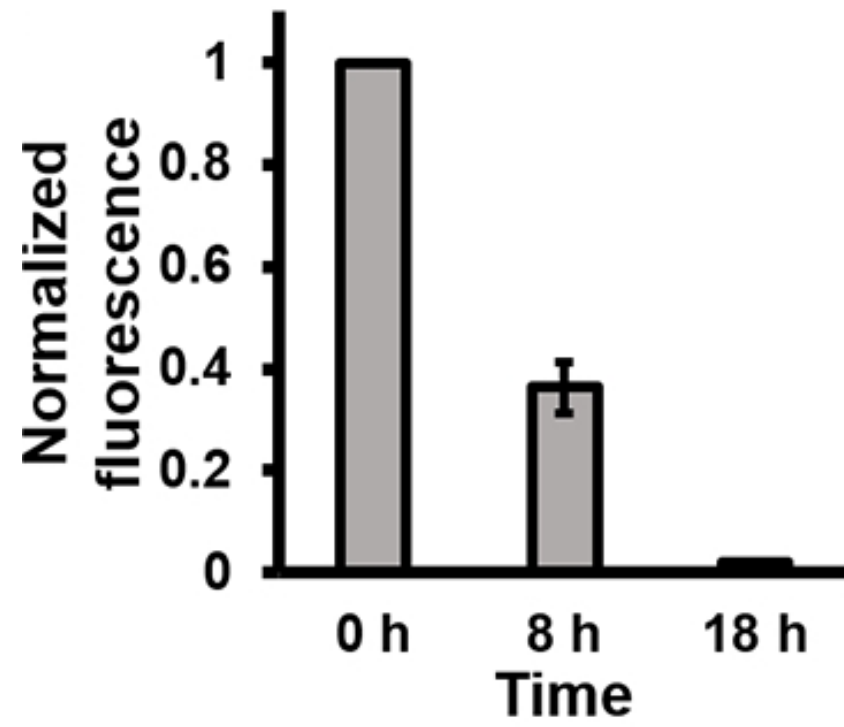

|            |   |      |      |
|------------|---|------|------|
| Time (h)   | 0 | 8    | 18   |
| Normalized | 1 | 0.36 | 0.02 |
| sd         | 0 | 0.05 | 0.00 |

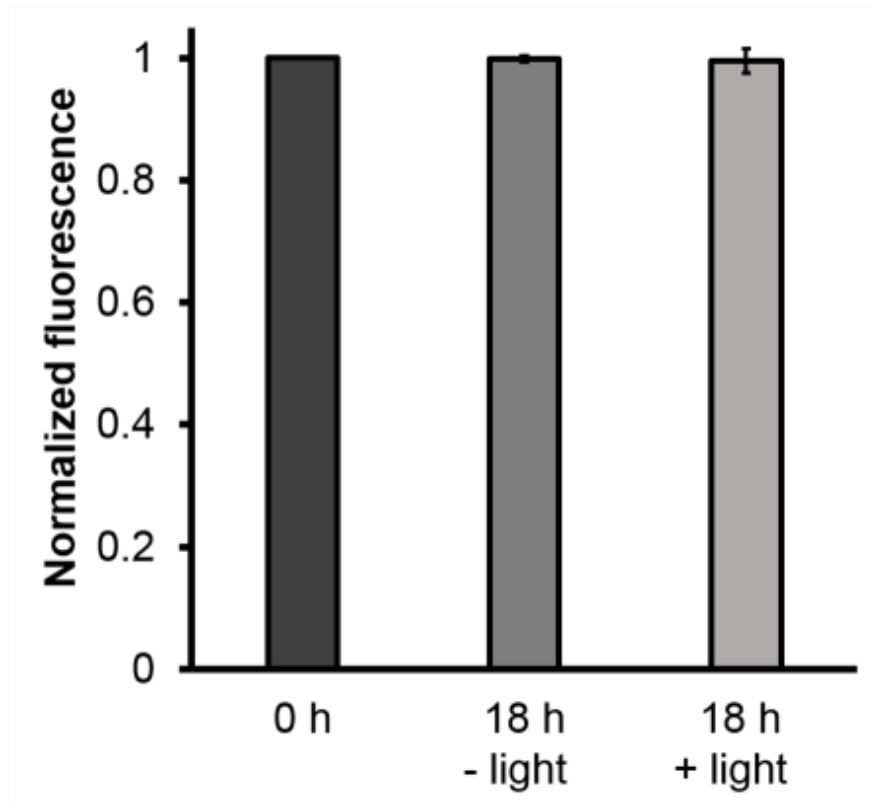

| Conditions | 0 h | 18 h without light | 18 with light |
|------------|-----|--------------------|---------------|
| Normalized | 1   | 0.996              | 0.973         |
| sd         | 0   | 0.005              | 0.020         |

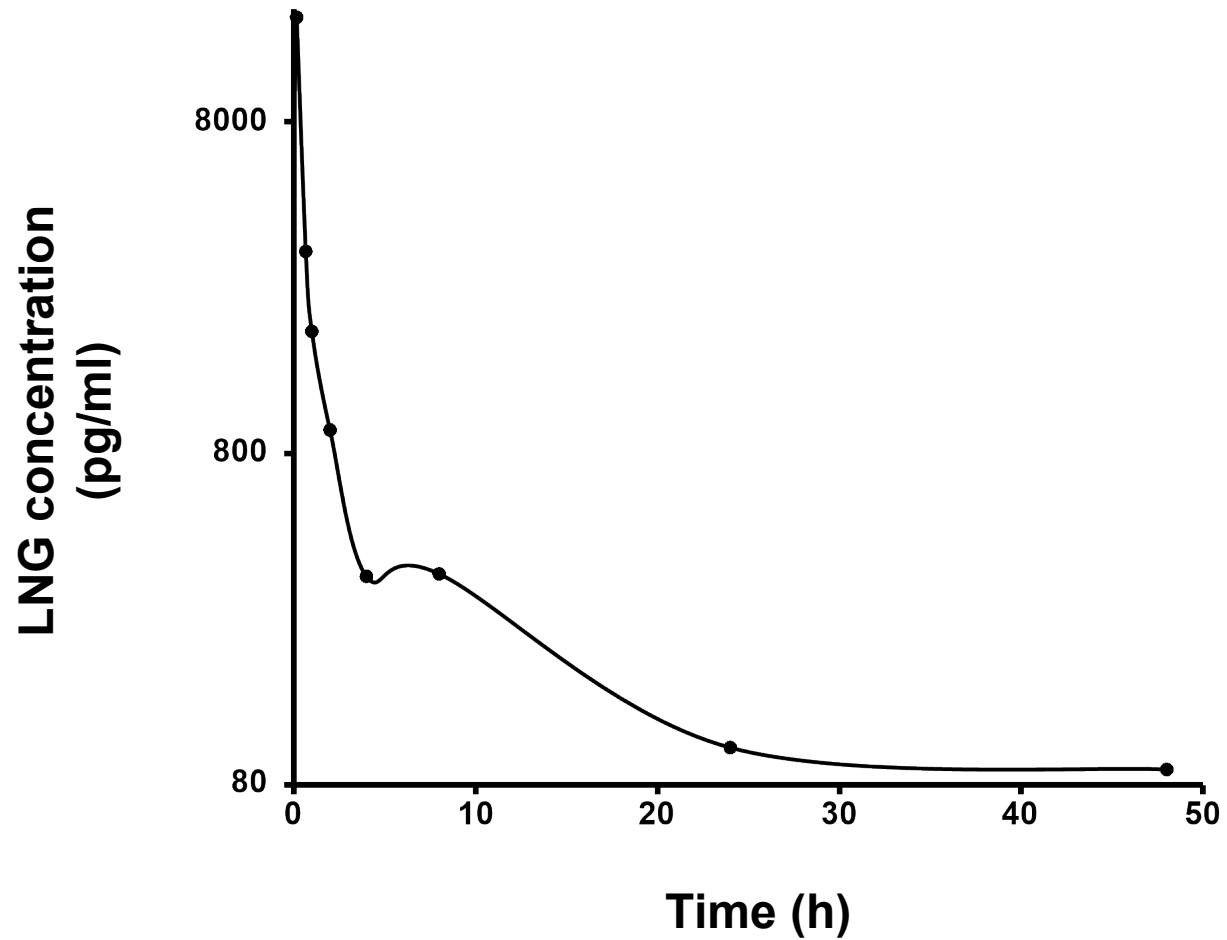

| Time (h) | Mean (pg/ml) | sd       |
|----------|--------------|----------|
| 0.17     | 16536        | 318.5421 |
| 0.67     | 3255.5       | 183.2341 |
| 1        | 1867.375     | 117.3665 |
| 2        | 941.88       | 71.80486 |
| 4        | 341.05       | 5.753124 |
| 8        | 346.9        | 6.075643 |
| 24       | 103.8075     | 2.748307 |
| 48       | 89.17        | 2.714534 |
