# Supplementary material for: Unraveling the role of intra-cellular metabolites in the lactic acid production by novel Bacillus amyloliquefaciens using sugarcane molasses as a substratum
Source: Royal Society of Chemistry journal article supplement (doi:10.1039/d3mo00141e), 2023-08-31
Supplement: d3mo00141e5.pdf [file d3mo00141e5.pdf]

**Figure S1: Relative abundance of up-regulated intra-cellular metabolites of *Bacillus amyloliquefaciens* J2V2AA in control and treated (30% SM) based on LC-MS spectrum**

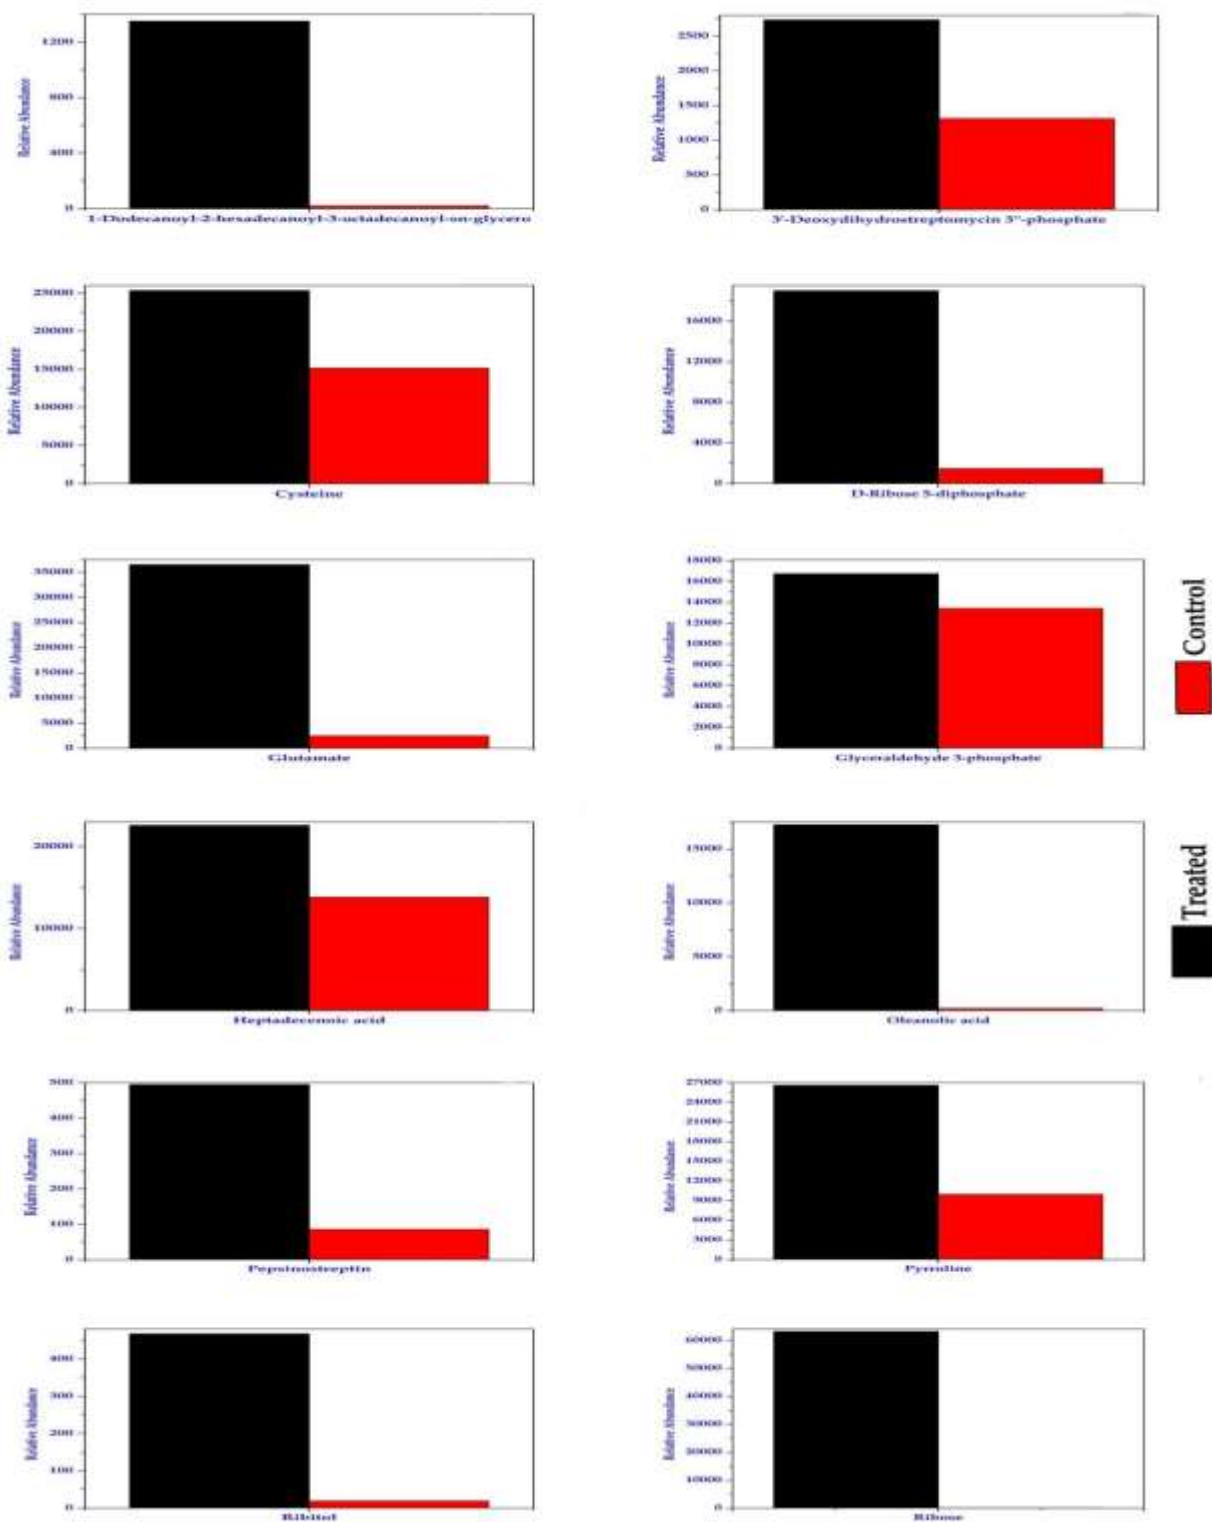

**Figure S2: Relative abundance of down-regulated intra-cellular metabolites of *Bacillus amyloliquefaciens* J2V2AA in control and treated (30% SM) based on LC-MS spectrum**

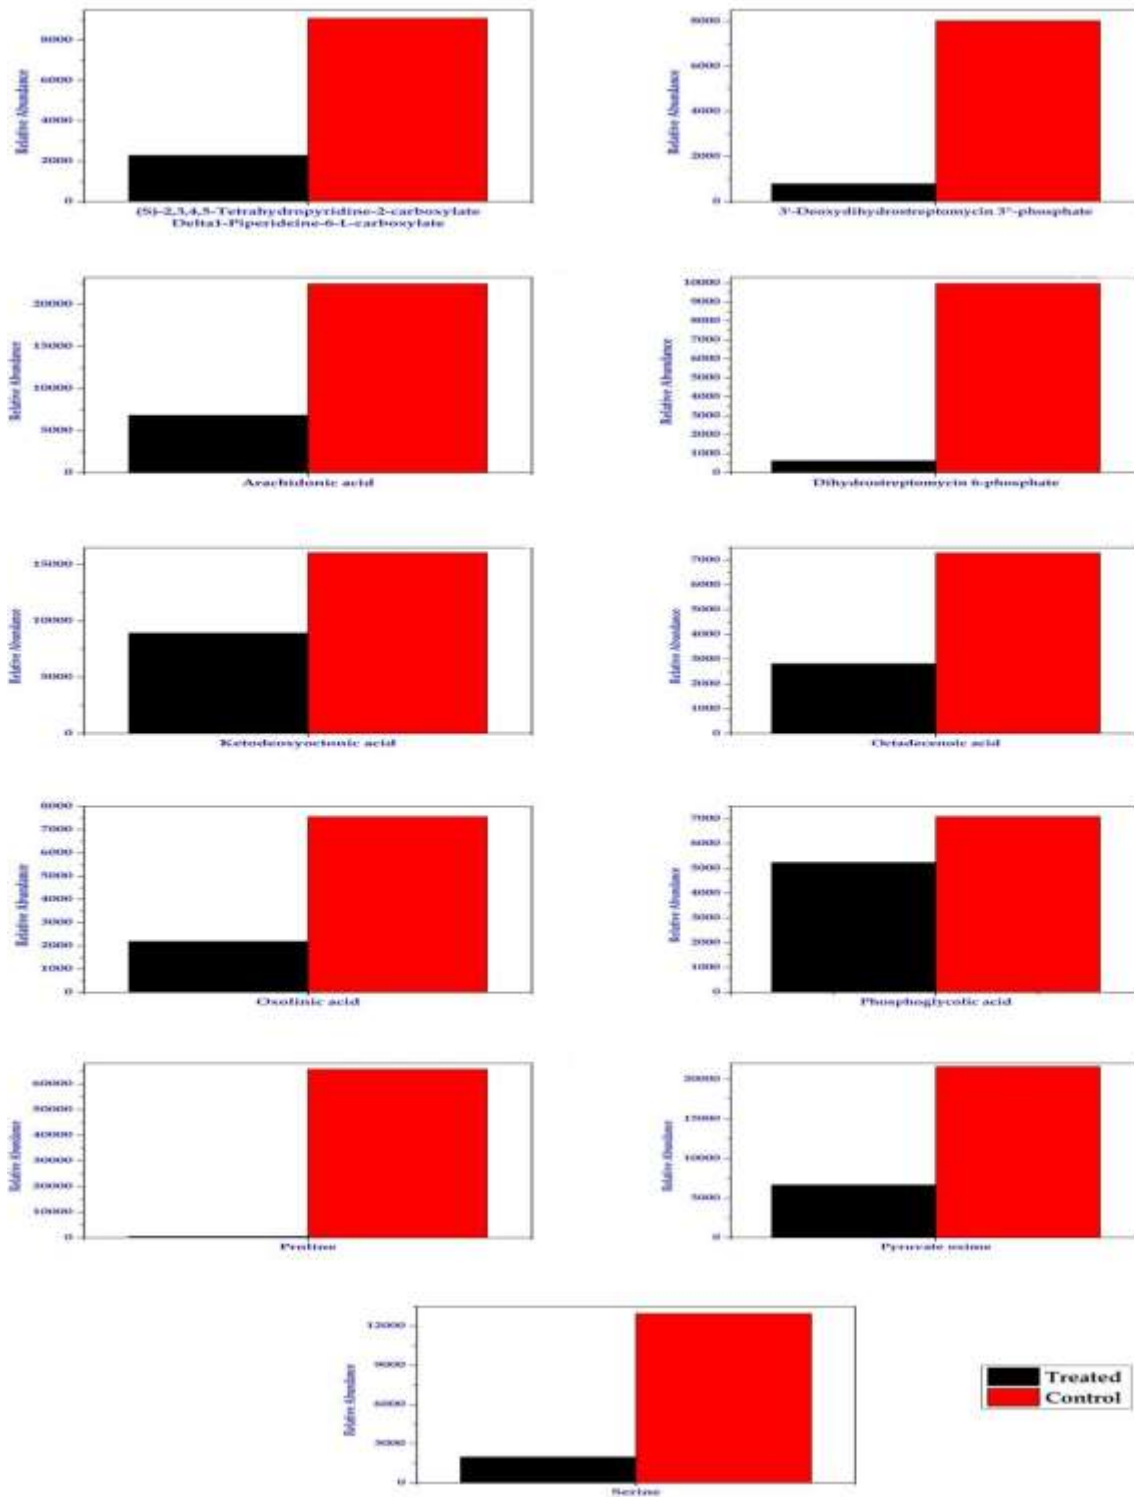

**Figure S3: GC-MS chromatogram of intra-cellular metabolites of *Bacillus amyloliquefaciens* J2V2AA in control and treated (30% SM)**

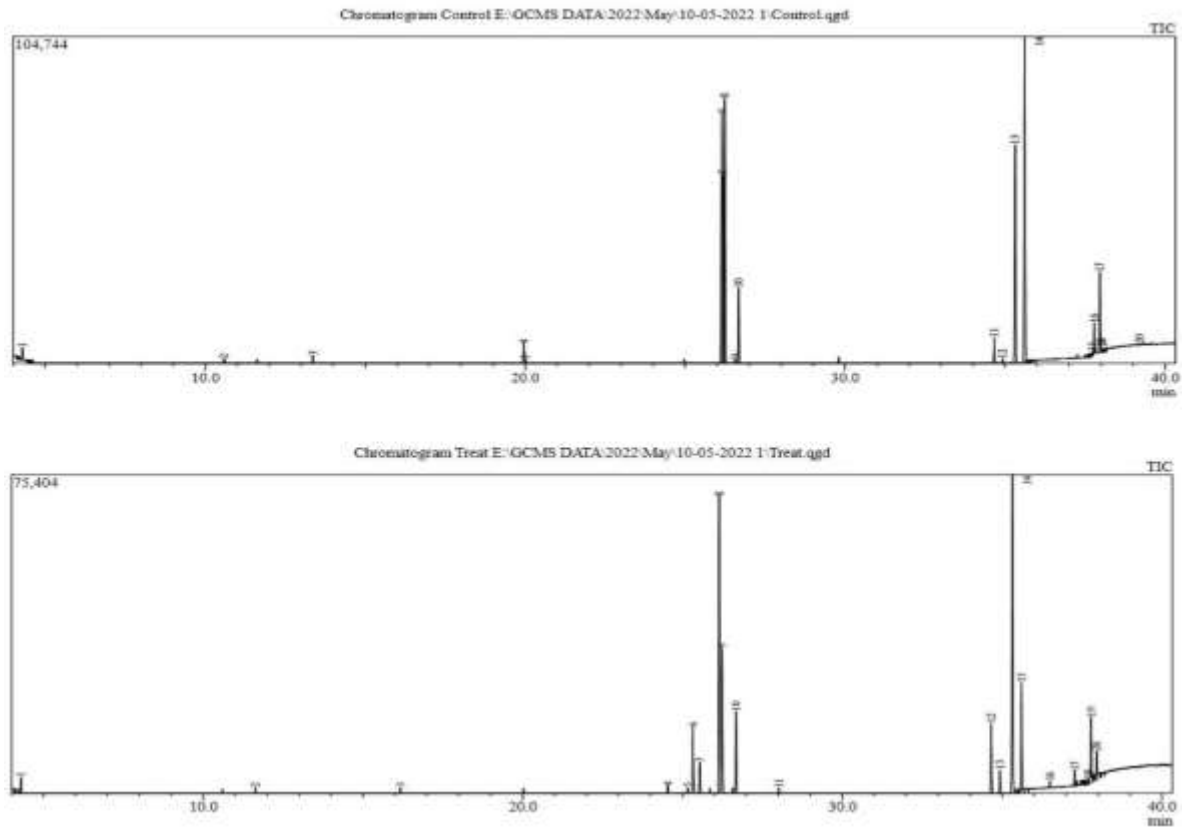

**Figure S4: LC-MS chromatogram of intra-cellular metabolites of *Bacillus amyloliquefaciens* J2V2AA in control and treated (30% SM)**

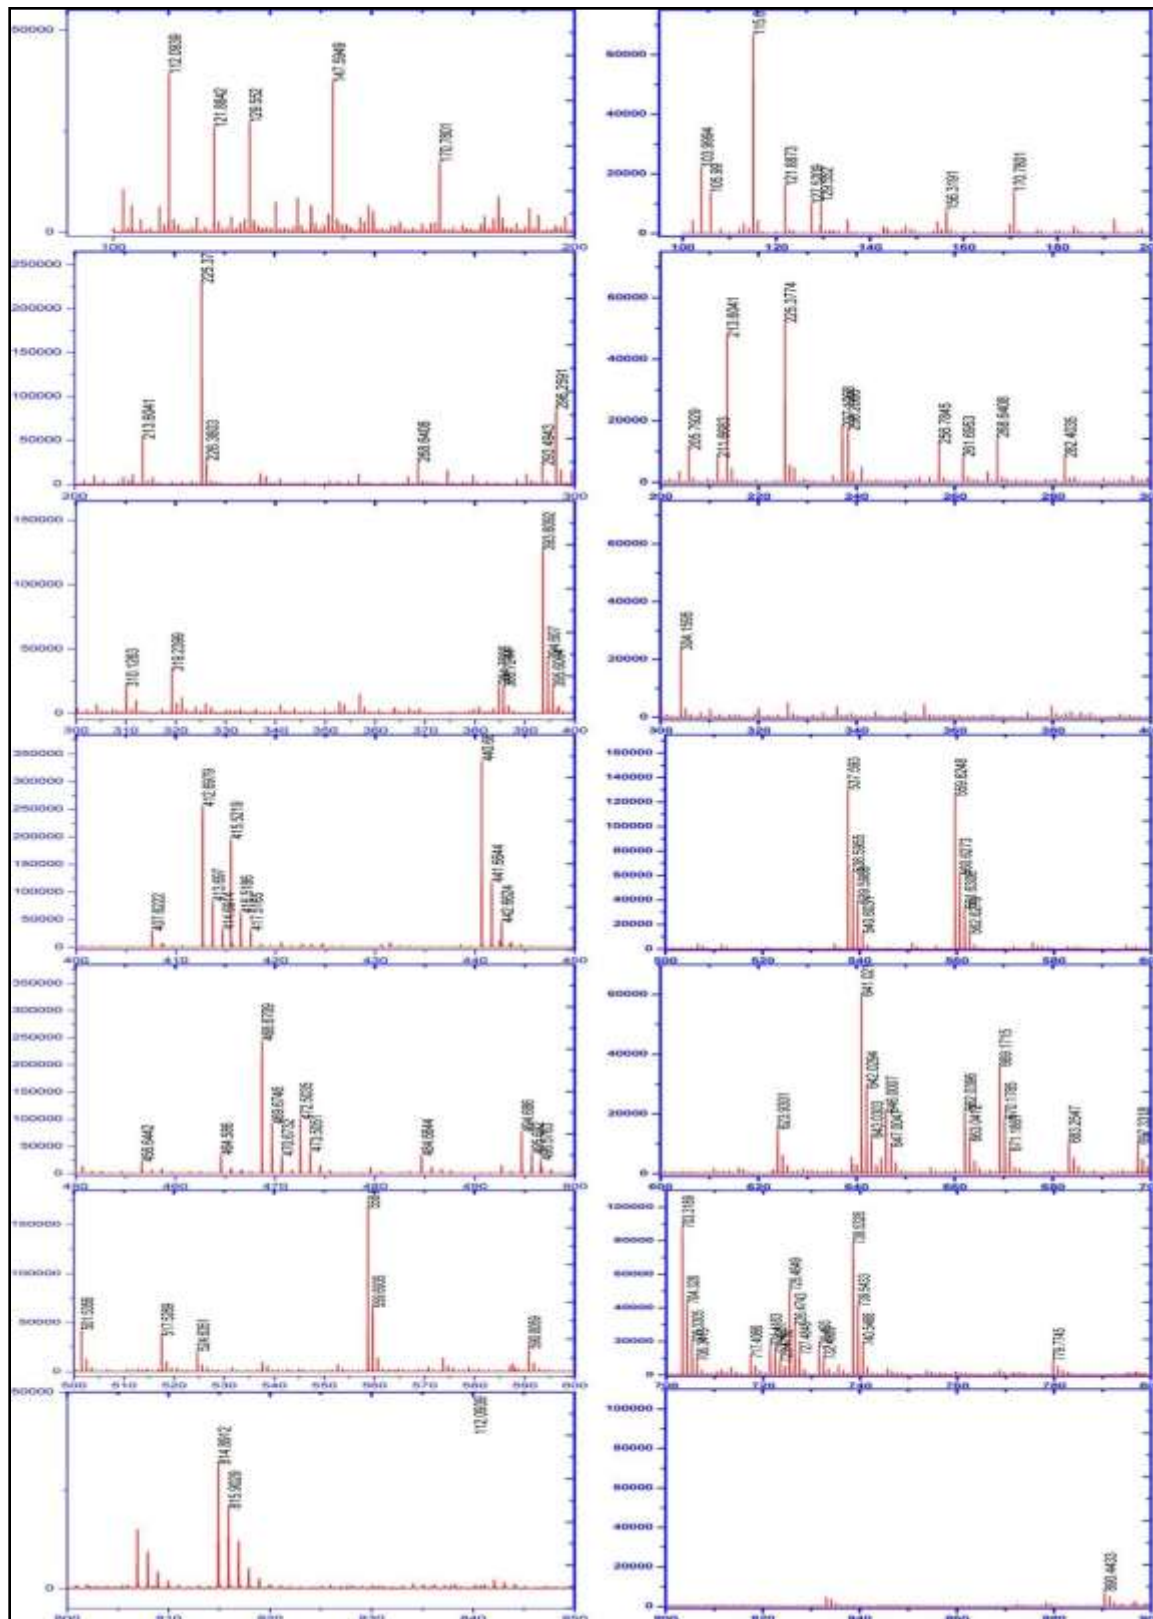

Figure S5: FTIR spectrum of lactic acid produced by *Bacillus amyloliquefaciens* J2V2AA

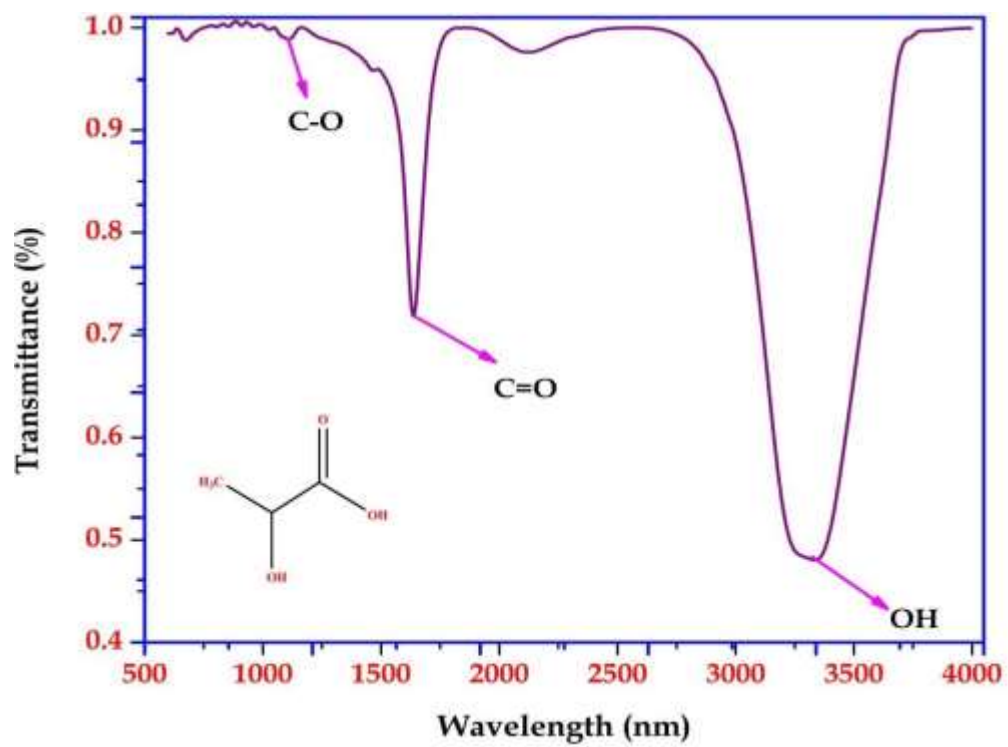

Figure S6: UV-visible spectrum of lactic acid produced by *Bacillus amyloliquefaciens* J2V2AA

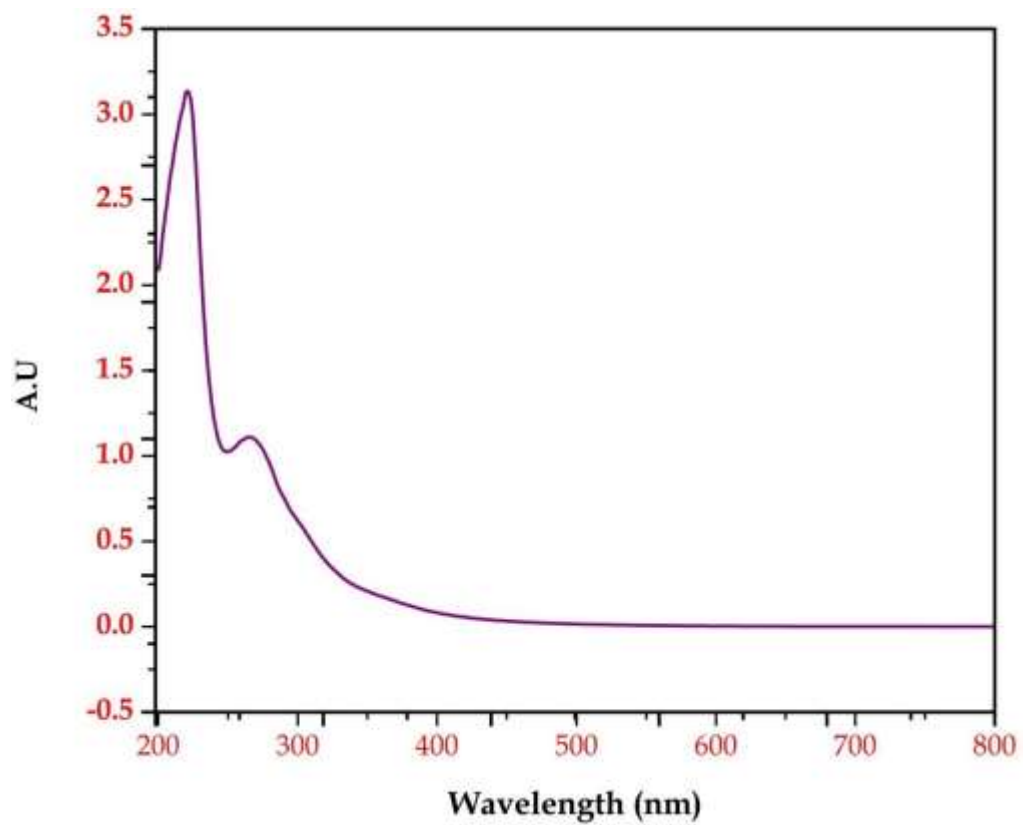

**Table S1: List identified intra-cellular metabolites of second generation lactic acid production by *Bacillus amyloliquefaciens* J2V2AA identified through LC-MS spectrum**

|    |                                                                                 |
|----|---------------------------------------------------------------------------------|
| 1  | Ribose                                                                          |
| 2  | Oleanolic acid                                                                  |
| 3  | 1-Dodecanoyl-2-hexadecanoyl-3-octadecanoyl-sn-glycero                           |
| 4  | Ribitol                                                                         |
| 5  | Glutamate                                                                       |
| 6  | D-Ribose 5-diphosphate                                                          |
| 7  | Pepsinostreptin                                                                 |
| 8  | Pyrroline                                                                       |
| 9  | Isopentenyl pyrophosphate                                                       |
| 10 | Cysteine                                                                        |
| 11 | Heptadecenoic acid                                                              |
| 12 | Glyceraldehyde 3-phosphate                                                      |
| 13 | Phosphoglycolic acid                                                            |
| 14 | Ketodeoxyoctonic acid                                                           |
| 15 | Octadecenoic acid                                                               |
| 16 | Pyruvate oxime                                                                  |
| 17 | Arachidonic acid                                                                |
| 18 | Oxolinic acid                                                                   |
| 19 | (S)-2,3,4,5-Tetrahydropyridine-2-carboxylate Delta 1-Piperidine-6-L-carboxylate |
| 20 | Serine                                                                          |
| 21 | 3'-Deoxydihydrostreptomycin 3"-phosphate                                        |
| 22 | Dihydrostreptomycin 6-phosphate                                                 |
| 23 | Proline                                                                         |

**Table S2: List identified intra-cellular metabolites of second generation lactic acid production by *Bacillus amyloliquefaciens* J2V2AA identified through GC-MS spectrum**

|    |                                                                                                                                 |
|----|---------------------------------------------------------------------------------------------------------------------------------|
| 2  | 2,3-(METHYLENEDIOXY)-6-((TRIMETHYLSILYL)METHYL)BENZYL IODIDE                                                                    |
| 3  | BENZAMIDE, N-[9-[3-[(BENZOYLOXY)METHYL]-4-(FORMYLOXY)-2-NITRO-5-(PHENYLMETHOXY)CYCLOPENTYL]-9H-PURIN-6-YL]-, [1R-(1.ALPHA.,2.BE |
| 4  | 2,2-Dimethyl-propyl 2,2-dimethyl-propanesulfinyl sulfone                                                                        |
| 5  | (1S,2S)-CIS-2-PHENYLCYCLOPENTANOL (R)-O-ACETYLMANDELATE ESTER                                                                   |
| 6  | Furo[2,3-c]pyridine, 2,3-dihydro-2,7-dimethyl-                                                                                  |
| 7  | 3,8-DIOXA-2,9-DISILADECANE, 2,2,9,9-TETRAMETHYL-5,6-BIS[(TRIMETHYLSILYL)OXY]-, (R*,S*)-                                         |
| 8  | D-Allose, oxime (isomer 1), 6TMS derivative                                                                                     |
| 9  | 3,8-DIOXA-2,9-DISILADECANE, 2,2,9,9-TETRAMETHYL-5,6-BIS[(TRIMETHYLSILYL)OXY]-, (R*,S*)-                                         |
| 10 | Furo[2,3-c]pyridine, 2,3-dihydro-2,7-dimethyl-                                                                                  |
| 11 | HEXADECANOIC ACID                                                                                                               |
| 12 | OCTADECANOIC ACID, 2-HYDROXY-1-(HYDROXYMETHYL)ETHYL ESTER                                                                       |
| 13 | Furo[2,3-c]pyridine, 2,3-dihydro-2,7-dimethyl-                                                                                  |
| 14 | HEXADECANOIC ACID, 2,3-BIS[(TRIMETHYLSILYL)OXY]PROPYL ESTER                                                                     |
| 15 | 1-Monopalmitin, 2TMS derivative                                                                                                 |
| 16 | 3,4-DIHYDRO-4-(1,3-DIOXOLAN-2-YL)-5,7-DIMETHOXY-1(2H)-BENZOPYRAN-2-ONE                                                          |
| 17 | 4-HYDROXY-5-METHYL-3-HEXANONE                                                                                                   |
| 18 | Glycerol monostearate, 2TMS derivative                                                                                          |
| 19 | 4-(Benzoylmethyl)-6-methyl-2H-1,4-benzoxazin-3-one                                                                              |
| 20 | (+)-1-(ACETOXY)-2-(1-BROMOETHYL)-3-METHOXYANTHRAQUINONE                                                                         |
| 21 | 2,3-BIS(TRIMETHYLSILOXY)-2,3-BIS(4'-METHYLPHENYL)BUTANE                                                                         |
| 22 | 2-KETO-BUTYRIC-ACID                                                                                                             |
| 23 | 2-KETO-BUTYRIC-ACID                                                                                                             |
| 24 | (SS)- or (RR)-2,3-hexanediol                                                                                                    |
| 25 | (SS)- or (RR)-2,3-hexanediol                                                                                                    |
| 26 | 4-THIAZOLIDINECARBOXYLIC ACID, 3-(TRIMETHYLSILYL)-, TRIMETHYLSILYL ESTER                                                        |



|    |                                                                                                                                 |
|----|---------------------------------------------------------------------------------------------------------------------------------|
| 27 | SILANE, (PHENYLOXIRANYLIDENE)BIS[TRIMETHYL-                                                                                     |
| 28 | (SS)- or (RR)-2,3-hexanediol                                                                                                    |
| 29 | OCTADECANOIC ACID, 2-HYDROXY-1-(HYDROXYMETHYL)ETHYL ESTER                                                                       |
| 30 | 1,2-BENZENEDICARBOXYLIC ACID, DICYCLOHEXYL ESTER                                                                                |
| 31 | 1-Monopalmitin, 2TMS derivative                                                                                                 |
| 32 | 2'-O-[(METHOXYCARBONYL)METHYL]-5-METHYLURIDINE                                                                                  |
| 33 | 3-BUTEN-2-OL, FORMATE                                                                                                           |
| 34 | 2-((TRIMETHYLSILYL)ETHYNYL)HEPTAMETHYLTRISILANE                                                                                 |
| 35 | 2,2,4,4-TETRAMETHYL-3-PENTYL TRANS-DECAHYDRO-6.BETA.-[TERT-BUTYLDIMETHYLSILYL)OXY]-5,5,8A.BETA.-TRIMETHYL-2-METHYLENE-1.XI.-NAP |
| 36 | BUTYL ( PYRIDINE-2,6-DIPHENYL)PHENYLPHOSPHINATE                                                                                 |

**Figure Legends:**

**Figure S1:** Relative abundance of up-regulated intra-cellular metabolites of *Bacillus amyloliquefaciens* J2V2AA in control and treated (30% SM) based on LC-MS spectrum

**Figure S2:** Relative abundance of down-regulated intra-cellular metabolites of *Bacillus amyloliquefaciens* J2V2AA in control and treated (30% SM) based on LC-MS spectrum

**Figure S3:** GC-MS chromatogram of intra-cellular metabolites of *Bacillus amyloliquefaciens* J2V2AA in control and treated (30% SM)

**Figure S4:** LC-MS chromatogram of intra-cellular metabolites of *Bacillus amyloliquefaciens* J2V2AA in control and treated (30% SM)

**Figure S5:** FTIR spectrum of lactic acid produced by *Bacillus amyloliquefaciens* J2V2AA

**Figure S6:** UV-visible spectrum of lactic acid produced by *Bacillus amyloliquefaciens* J2V2AA

**Table Legends:**

**Table S1:** List identified intra-cellular metabolites of second generation lactic acid production by *Bacillus amyloliquefaciens* J2V2AA identified through LC-MS spectrum

**Table S2:** List identified intra-cellular metabolites of second generation lactic acid production by *Bacillus amyloliquefaciens* J2V2AA identified through GC-MS spectrum
